# Supplementary material
Source: Preprints.org preprint supplement (doi:10.20944/preprints202006.0191.v1)
Supplement: Supplementary file 1 [file supplementary]

## Sheet: Supplementary_Table 1
Supplementary Table 1 : The recently submitted structures in RCSB-PDB database, of different proteins of SARS-Cov-3
PDB ID	Structure Title	Experimental Method	Release Date	Stucture Keywords	Structure Author	Resolution (Ã…)	Molecular Weight (Structure)	Number of Polymer Residues	Number of Atoms
5R7Y	PanDDA analysis group deposition -- Crystal Structure of COVID-19 main protease in complex with Z45617795	X-RAY DIFFRACTION	2020-03-11	HYDROLASE/HYDROLASE INHIBITOR	Fearon, D., Powell, A.J., Douangamath, A., Owen, C.D., Wild, C., Krojer, T., Lukacik, P., Strain-Damerell, C.M., Walsh, M.A., von Delft, F.	1.65	34.37	306	2779
5R7Z	PanDDA analysis group deposition -- Crystal Structure of SARS-CoV-2 main protease in complex with Z1220452176	X-RAY DIFFRACTION	2020-03-11	HYDROLASE/HYDROLASE INHIBITOR	Fearon, D., Powell, A.J., Douangamath, A., Owen, C.D., Wild, C., Krojer, T., Lukacik, P., Strain-Damerell, C.M., Walsh, M.A., von Delft, F.	1.59	34.36	306	2730
5R80	PanDDA analysis group deposition -- Crystal Structure of SARS-CoV-2 main protease in complex with Z18197050	X-RAY DIFFRACTION	2020-03-11	HYDROLASE/HYDROLASE INHIBITOR	Fearon, D., Powell, A.J., Douangamath, A., Owen, C.D., Wild, C., Krojer, T., Lukacik, P., Strain-Damerell, C.M., Walsh, M.A., von Delft, F.	1.93	34.28	306	2726
5R81	PanDDA analysis group deposition -- Crystal Structure of COVID-19 main protease in complex with Z1367324110	X-RAY DIFFRACTION	2020-03-11	HYDROLASE/HYDROLASE INHIBITOR	Fearon, D., Powell, A.J., Douangamath, A., Owen, C.D., Wild, C., Krojer, T., Lukacik, P., Strain-Damerell, C.M., Walsh, M.A., von Delft, F.	1.95	34.36	306	2735
5R82	PanDDA analysis group deposition -- Crystal Structure of COVID-19 main protease in complex with Z219104216	X-RAY DIFFRACTION	2020-03-11	HYDROLASE/HYDROLASE INHIBITOR	Fearon, D., Powell, A.J., Douangamath, A., Owen, C.D., Wild, C., Krojer, T., Lukacik, P., Strain-Damerell, C.M., Walsh, M.A., von Delft, F.	1.31	34.29	306	2740
5R83	PanDDA analysis group deposition -- Crystal Structure of SARS-CoV-2 main protease in complex with Z44592329	X-RAY DIFFRACTION	2020-03-11	HYDROLASE/HYDROLASE INHIBITOR	Fearon, D., Powell, A.J., Douangamath, A., Owen, C.D., Wild, C., Krojer, T., Lukacik, P., Strain-Damerell, C.M., Walsh, M.A., von Delft, F.	1.58	34.27	306	2726
5R84	PanDDA analysis group deposition -- Crystal Structure of COVID-19 main protease in complex with Z31792168	X-RAY DIFFRACTION	2020-03-11	HYDROLASE/HYDROLASE INHIBITOR	Fearon, D., Powell, A.J., Douangamath, A., Owen, C.D., Wild, C., Krojer, T., Lukacik, P., Strain-Damerell, C.M., Walsh, M.A., von Delft, F.	1.83	34.28	306	2725
5R8T	PanDDA analysis group deposition of ground-state model of SARS-CoV-2 main protease screened against DSI poised (Enamine), Fraglites and Peplites (Newcastle university), Mini Frags (Astex), York 3D (York university), electrophile cysteine covalent (Weizman institute) fragment libraries	X-RAY DIFFRACTION	2020-04-01	HYDROLASE	Fearon, D., Owen, C.D., Douangamath, A., Lukacik, P., Powell, A.J., Strain-Damerell, C.M., Resnick, E., Krojer, T., Gehrtz, P., Wild, C., Aimon, A., Brandao-Neto, J., Carbery, A., Dunnett, L., Skyner, R., Snee, M., London, N., Walsh, M.A., von Delft, F.	1.27	34.06	306	2720
5RE4	PanDDA analysis group deposition -- Crystal Structure of SARS-CoV-2 main protease in complex with Z1129283193	X-RAY DIFFRACTION	2020-03-25	HYDROLASE/HYDROLASE INHIBITOR	Fearon, D., Owen, C.D., Douangamath, A., Lukacik, P., Powell, A.J., Strain-Damerell, C.M., Resnick, E., Krojer, T., Gehrtz, P., Wild, C., Aimon, A., Brandao-Neto, J., Carbery, A., Dunnett, L., Skyner, R., Snee, M., London, N., Walsh, M.A., von Delft, F.	1.88	34.21	306	2728
5RE5	PanDDA analysis group deposition -- Crystal Structure of SARS-CoV-2 main protease in complex with Z33545544	X-RAY DIFFRACTION	2020-03-25	HYDROLASE/HYDROLASE INHIBITOR	Fearon, D., Owen, C.D., Douangamath, A., Lukacik, P., Powell, A.J., Strain-Damerell, C.M., Resnick, E., Krojer, T., Gehrtz, P., Wild, C., Aimon, A., Brandao-Neto, J., Carbery, A., Dunnett, L., Skyner, R., Snee, M., London, N., Walsh, M.A., von Delft, F.	2.07	34.31	306	2730
5RE6	PanDDA analysis group deposition -- Crystal Structure of SARS-CoV-2 main protease in complex with Z54571979	X-RAY DIFFRACTION	2020-03-25	HYDROLASE/HYDROLASE INHIBITOR	Fearon, D., Owen, C.D., Douangamath, A., Lukacik, P., Powell, A.J., Strain-Damerell, C.M., Resnick, E., Krojer, T., Gehrtz, P., Wild, C., Aimon, A., Brandao-Neto, J., Carbery, A., Dunnett, L., Skyner, R., Snee, M., London, N., Walsh, M.A., von Delft, F.	1.87	34.29	306	2731
5RE7	PanDDA analysis group deposition -- Crystal Structure of SARS-CoV-2 main protease in complex with Z30932204	X-RAY DIFFRACTION	2020-03-25	HYDROLASE/HYDROLASE INHIBITOR	Fearon, D., Owen, C.D., Douangamath, A., Lukacik, P., Powell, A.J., Strain-Damerell, C.M., Resnick, E., Krojer, T., Gehrtz, P., Wild, C., Aimon, A., Brandao-Neto, J., Carbery, A., Dunnett, L., Skyner, R., Snee, M., London, N., Walsh, M.A., von Delft, F.	1.79	34.37	306	2919
5RE8	PanDDA analysis group deposition -- Crystal Structure of SARS-CoV-2 main protease in complex with Z2737076969	X-RAY DIFFRACTION	2020-03-25	HYDROLASE/HYDROLASE INHIBITOR	Fearon, D., Owen, C.D., Douangamath, A., Lukacik, P., Powell, A.J., Strain-Damerell, C.M., Resnick, E., Krojer, T., Gehrtz, P., Wild, C., Aimon, A., Brandao-Neto, J., Carbery, A., Dunnett, L., Skyner, R., Snee, M., London, N., Walsh, M.A., von Delft, F.	1.81	34.27	306	2731
5RE9	PanDDA analysis group deposition -- Crystal Structure of SARS-CoV-2 main protease in complex with Z2856434836	X-RAY DIFFRACTION	2020-03-25	HYDROLASE/HYDROLASE INHIBITOR	Fearon, D., Owen, C.D., Douangamath, A., Lukacik, P., Powell, A.J., Strain-Damerell, C.M., Resnick, E., Krojer, T., Gehrtz, P., Wild, C., Aimon, A., Brandao-Neto, J., Carbery, A., Dunnett, L., Skyner, R., Snee, M., London, N., Walsh, M.A., von Delft, F.	1.72	34.47	306	2911
5REA	PanDDA analysis group deposition -- Crystal Structure of SARS-CoV-2 main protease in complex with Z31432226	X-RAY DIFFRACTION	2020-03-25	HYDROLASE/HYDROLASE INHIBITOR	Fearon, D., Owen, C.D., Douangamath, A., Lukacik, P., Powell, A.J., Strain-Damerell, C.M., Resnick, E., Krojer, T., Gehrtz, P., Wild, C., Aimon, A., Brandao-Neto, J., Carbery, A., Dunnett, L., Skyner, R., Snee, M., London, N., Walsh, M.A., von Delft, F.	1.63	34.31	306	2917
5REB	PanDDA analysis group deposition -- Crystal Structure of SARS-CoV-2 main protease in complex with Z2856434899	X-RAY DIFFRACTION	2020-03-25	HYDROLASE/HYDROLASE INHIBITOR	Fearon, D., Owen, C.D., Douangamath, A., Lukacik, P., Powell, A.J., Strain-Damerell, C.M., Resnick, E., Krojer, T., Gehrtz, P., Wild, C., Aimon, A., Brandao-Neto, J., Carbery, A., Dunnett, L., Skyner, R., Snee, M., London, N., Walsh, M.A., von Delft, F.	1.68	34.26	306	2736
5REC	PanDDA analysis group deposition -- Crystal Structure of SARS-CoV-2 main protease in complex with Z1587220559	X-RAY DIFFRACTION	2020-03-25	HYDROLASE/HYDROLASE INHIBITOR	Fearon, D., Owen, C.D., Douangamath, A., Lukacik, P., Powell, A.J., Strain-Damerell, C.M., Resnick, E., Krojer, T., Gehrtz, P., Wild, C., Aimon, A., Brandao-Neto, J., Carbery, A., Dunnett, L., Skyner, R., Snee, M., London, N., Walsh, M.A., von Delft, F.	1.73	34.38	306	2733
5RED	PanDDA analysis group deposition -- Crystal Structure of SARS-CoV-2 main protease in complex with Z2856434865	X-RAY DIFFRACTION	2020-03-25	HYDROLASE/HYDROLASE INHIBITOR	Fearon, D., Owen, C.D., Douangamath, A., Lukacik, P., Powell, A.J., Strain-Damerell, C.M., Resnick, E., Krojer, T., Gehrtz, P., Wild, C., Aimon, A., Brandao-Neto, J., Carbery, A., Dunnett, L., Skyner, R., Snee, M., London, N., Walsh, M.A., von Delft, F.	1.47	34.28	306	2922
5REE	PanDDA analysis group deposition -- Crystal Structure of SARS-CoV-2 main protease in complex with Z2217052426	X-RAY DIFFRACTION	2020-03-25	HYDROLASE/HYDROLASE INHIBITOR	Fearon, D., Owen, C.D., Douangamath, A., Lukacik, P., Powell, A.J., Strain-Damerell, C.M., Resnick, E., Krojer, T., Gehrtz, P., Wild, C., Aimon, A., Brandao-Neto, J., Carbery, A., Dunnett, L., Skyner, R., Snee, M., London, N., Walsh, M.A., von Delft, F.	1.77	34.27	306	2730
5REF	PanDDA analysis group deposition -- Crystal Structure of SARS-CoV-2 main protease in complex with Z24758179	X-RAY DIFFRACTION	2020-03-25	HYDROLASE/HYDROLASE INHIBITOR	Fearon, D., Owen, C.D., Douangamath, A., Lukacik, P., Powell, A.J., Strain-Damerell, C.M., Resnick, E., Krojer, T., Gehrtz, P., Wild, C., Aimon, A., Brandao-Neto, J., Carbery, A., Dunnett, L., Skyner, R., Snee, M., London, N., Walsh, M.A., von Delft, F.	1.61	34.29	306	2728
5REG	PanDDA analysis group deposition -- Crystal Structure of SARS-CoV-2 main protease in complex with Z1545313172	X-RAY DIFFRACTION	2020-03-25	HYDROLASE/HYDROLASE INHIBITOR	Fearon, D., Owen, C.D., Douangamath, A., Lukacik, P., Powell, A.J., Strain-Damerell, C.M., Resnick, E., Krojer, T., Gehrtz, P., Wild, C., Aimon, A., Brandao-Neto, J., Carbery, A., Dunnett, L., Skyner, R., Snee, M., London, N., Walsh, M.A., von Delft, F.	1.67	34.29	306	2915
5REH	PanDDA analysis group deposition -- Crystal Structure of SARS-CoV-2 main protease in complex with Z111507846	X-RAY DIFFRACTION	2020-03-25	HYDROLASE/HYDROLASE INHIBITOR	Fearon, D., Owen, C.D., Douangamath, A., Lukacik, P., Powell, A.J., Strain-Damerell, C.M., Resnick, E., Krojer, T., Gehrtz, P., Wild, C., Aimon, A., Brandao-Neto, J., Carbery, A., Dunnett, L., Skyner, R., Snee, M., London, N., Walsh, M.A., von Delft, F.	1.8	34.39	306	2730
5REI	PanDDA analysis group deposition -- Crystal Structure of SARS-CoV-2 main protease in complex with Z2856434856	X-RAY DIFFRACTION	2020-03-25	HYDROLASE/HYDROLASE INHIBITOR	Fearon, D., Owen, C.D., Douangamath, A., Lukacik, P., Powell, A.J., Strain-Damerell, C.M., Resnick, E., Krojer, T., Gehrtz, P., Wild, C., Aimon, A., Brandao-Neto, J., Carbery, A., Dunnett, L., Skyner, R., Snee, M., London, N., Walsh, M.A., von Delft, F.	1.82	34.27	306	2736
5REJ	PanDDA analysis group deposition -- Crystal Structure of SARS-CoV-2 main protease in complex with PCM-0102241	X-RAY DIFFRACTION	2020-03-25	HYDROLASE/HYDROLASE INHIBITOR	Fearon, D., Owen, C.D., Douangamath, A., Lukacik, P., Powell, A.J., Strain-Damerell, C.M., Resnick, E., Krojer, T., Gehrtz, P., Wild, C., Aimon, A., Brandao-Neto, J., Carbery, A., Dunnett, L., Skyner, R., Snee, M., London, N., Walsh, M.A., von Delft, F.	1.72	34.41	306	2739
5REK	PanDDA analysis group deposition -- Crystal Structure of SARS-CoV-2 main protease in complex with PCM-0102327	X-RAY DIFFRACTION	2020-03-25	HYDROLASE/HYDROLASE INHIBITOR	Fearon, D., Owen, C.D., Douangamath, A., Lukacik, P., Powell, A.J., Strain-Damerell, C.M., Resnick, E., Krojer, T., Gehrtz, P., Wild, C., Aimon, A., Brandao-Neto, J., Carbery, A., Dunnett, L., Skyner, R., Snee, M., London, N., Walsh, M.A., von Delft, F.	1.74	34.35	306	2730
5REL	PanDDA analysis group deposition -- Crystal Structure of SARS-CoV-2 main protease in complex with PCM-0102340	X-RAY DIFFRACTION	2020-03-25	HYDROLASE/HYDROLASE INHIBITOR	Fearon, D., Owen, C.D., Douangamath, A., Lukacik, P., Powell, A.J., Strain-Damerell, C.M., Resnick, E., Krojer, T., Gehrtz, P., Wild, C., Aimon, A., Brandao-Neto, J., Carbery, A., Dunnett, L., Skyner, R., Snee, M., London, N., Walsh, M.A., von Delft, F.	1.62	34.29	306	2727
5REM	PanDDA analysis group deposition -- Crystal Structure of SARS-CoV-2 main protease in complex with PCM-0103016	X-RAY DIFFRACTION	2020-03-25	HYDROLASE/HYDROLASE INHIBITOR	Fearon, D., Owen, C.D., Douangamath, A., Lukacik, P., Powell, A.J., Strain-Damerell, C.M., Resnick, E., Krojer, T., Gehrtz, P., Wild, C., Aimon, A., Brandao-Neto, J., Carbery, A., Dunnett, L., Skyner, R., Snee, M., London, N., Walsh, M.A., von Delft, F.	1.96	34.31	306	2733
5REN	PanDDA analysis group deposition -- Crystal Structure of SARS-CoV-2 main protease in complex with PCM-0102425	X-RAY DIFFRACTION	2020-03-25	HYDROLASE/HYDROLASE INHIBITOR	Fearon, D., Owen, C.D., Douangamath, A., Lukacik, P., Powell, A.J., Strain-Damerell, C.M., Resnick, E., Krojer, T., Gehrtz, P., Wild, C., Aimon, A., Brandao-Neto, J., Carbery, A., Dunnett, L., Skyner, R., Snee, M., London, N., Walsh, M.A., von Delft, F.	2.15	34.32	306	2736
5REO	PanDDA analysis group deposition -- Crystal Structure of SARS-CoV-2 main protease in complex with PCM-0102578	X-RAY DIFFRACTION	2020-03-25	HYDROLASE/HYDROLASE INHIBITOR	Fearon, D., Owen, C.D., Douangamath, A., Lukacik, P., Powell, A.J., Strain-Damerell, C.M., Resnick, E., Krojer, T., Gehrtz, P., Wild, C., Aimon, A., Brandao-Neto, J., Carbery, A., Dunnett, L., Skyner, R., Snee, M., London, N., Walsh, M.A., von Delft, F.	1.88	34.25	306	2729
5REP	PanDDA analysis group deposition -- Crystal Structure of SARS-CoV-2 main protease in complex with PCM-0102201	X-RAY DIFFRACTION	2020-03-25	HYDROLASE/HYDROLASE INHIBITOR	Fearon, D., Owen, C.D., Douangamath, A., Lukacik, P., Powell, A.J., Strain-Damerell, C.M., Resnick, E., Krojer, T., Gehrtz, P., Wild, C., Aimon, A., Brandao-Neto, J., Carbery, A., Dunnett, L., Skyner, R., Snee, M., London, N., Walsh, M.A., von Delft, F.	1.81	34.44	306	2735
5RER	PanDDA analysis group deposition -- Crystal Structure of SARS-CoV-2 main protease in complex with PCM-0102615	X-RAY DIFFRACTION	2020-03-25	HYDROLASE/HYDROLASE INHIBITOR	Fearon, D., Owen, C.D., Douangamath, A., Lukacik, P., Powell, A.J., Strain-Damerell, C.M., Resnick, E., Krojer, T., Gehrtz, P., Wild, C., Aimon, A., Brandao-Neto, J., Carbery, A., Dunnett, L., Skyner, R., Snee, M., London, N., Walsh, M.A., von Delft, F.	1.88	34.28	306	2735
5RES	PanDDA analysis group deposition -- Crystal Structure of SARS-CoV-2 main protease in complex with PCM-0102281	X-RAY DIFFRACTION	2020-03-25	HYDROLASE/HYDROLASE INHIBITOR	Fearon, D., Owen, C.D., Douangamath, A., Lukacik, P., Powell, A.J., Strain-Damerell, C.M., Resnick, E., Krojer, T., Gehrtz, P., Wild, C., Aimon, A., Brandao-Neto, J., Carbery, A., Dunnett, L., Skyner, R., Snee, M., London, N., Walsh, M.A., von Delft, F.	1.65	34.35	306	2737
5RET	PanDDA analysis group deposition -- Crystal Structure of SARS-CoV-2 main protease in complex with PCM-0102269	X-RAY DIFFRACTION	2020-03-25	HYDROLASE/HYDROLASE INHIBITOR	Fearon, D., Owen, C.D., Douangamath, A., Lukacik, P., Powell, A.J., Strain-Damerell, C.M., Resnick, E., Krojer, T., Gehrtz, P., Wild, C., Aimon, A., Brandao-Neto, J., Carbery, A., Dunnett, L., Skyner, R., Snee, M., London, N., Walsh, M.A., von Delft, F.	1.68	34.39	306	2740
5REU	PanDDA analysis group deposition -- Crystal Structure of SARS-CoV-2 main protease in complex with PCM-0102395	X-RAY DIFFRACTION	2020-03-25	HYDROLASE/HYDROLASE INHIBITOR	Fearon, D., Owen, C.D., Douangamath, A., Lukacik, P., Powell, A.J., Strain-Damerell, C.M., Resnick, E., Krojer, T., Gehrtz, P., Wild, C., Aimon, A., Brandao-Neto, J., Carbery, A., Dunnett, L., Skyner, R., Snee, M., London, N., Walsh, M.A., von Delft, F.	1.69	34.43	306	2738
5REV	PanDDA analysis group deposition -- Crystal Structure of SARS-CoV-2 main protease in complex with PCM-0103072	X-RAY DIFFRACTION	2020-03-25	HYDROLASE/HYDROLASE INHIBITOR	Fearon, D., Owen, C.D., Douangamath, A., Lukacik, P., Powell, A.J., Strain-Damerell, C.M., Resnick, E., Krojer, T., Gehrtz, P., Wild, C., Aimon, A., Brandao-Neto, J., Carbery, A., Dunnett, L., Skyner, R., Snee, M., London, N., Walsh, M.A., von Delft, F.	1.6	34.32	306	2735
5REW	PanDDA analysis group deposition -- Crystal Structure of SARS-CoV-2 main protease in complex with PCM-0102275	X-RAY DIFFRACTION	2020-03-25	HYDROLASE/HYDROLASE INHIBITOR	Fearon, D., Owen, C.D., Douangamath, A., Lukacik, P., Powell, A.J., Strain-Damerell, C.M., Resnick, E., Krojer, T., Gehrtz, P., Wild, C., Aimon, A., Brandao-Neto, J., Carbery, A., Dunnett, L., Skyner, R., Snee, M., London, N., Walsh, M.A., von Delft, F.	1.55	34.27	306	2722
5REX	PanDDA analysis group deposition -- Crystal Structure of SARS-CoV-2 main protease in complex with PCM-0102287	X-RAY DIFFRACTION	2020-03-25	HYDROLASE/HYDROLASE INHIBITOR	Fearon, D., Owen, C.D., Douangamath, A., Lukacik, P., Powell, A.J., Strain-Damerell, C.M., Resnick, E., Krojer, T., Gehrtz, P., Wild, C., Aimon, A., Brandao-Neto, J., Carbery, A., Dunnett, L., Skyner, R., Snee, M., London, N., Walsh, M.A., von Delft, F.	2.07	34.41	306	2735
5REY	PanDDA analysis group deposition -- Crystal Structure of SARS-CoV-2 main protease in complex with PCM-0102911	X-RAY DIFFRACTION	2020-03-25	HYDROLASE/HYDROLASE INHIBITOR	Fearon, D., Owen, C.D., Douangamath, A., Lukacik, P., Powell, A.J., Strain-Damerell, C.M., Resnick, E., Krojer, T., Gehrtz, P., Wild, C., Aimon, A., Brandao-Neto, J., Carbery, A., Dunnett, L., Skyner, R., Snee, M., London, N., Walsh, M.A., von Delft, F.	1.96	34.31	306	2735
5REZ	PanDDA analysis group deposition -- Crystal Structure of SARS-CoV-2 main protease in complex with POB0129	X-RAY DIFFRACTION	2020-03-25	HYDROLASE/HYDROLASE INHIBITOR	Fearon, D., Owen, C.D., Douangamath, A., Lukacik, P., Powell, A.J., Strain-Damerell, C.M., Resnick, E., Krojer, T., Gehrtz, P., Wild, C., Aimon, A., Brandao-Neto, J., Carbery, A., Dunnett, L., Skyner, R., Snee, M., London, N., Walsh, M.A., von Delft, F.	1.79	34.26	306	2727
5RF0	PanDDA analysis group deposition -- Crystal Structure of SARS-CoV-2 main protease in complex with POB0073	X-RAY DIFFRACTION	2020-03-25	HYDROLASE/HYDROLASE INHIBITOR	Fearon, D., Owen, C.D., Douangamath, A., Lukacik, P., Powell, A.J., Strain-Damerell, C.M., Resnick, E., Krojer, T., Gehrtz, P., Wild, C., Aimon, A., Brandao-Neto, J., Carbery, A., Dunnett, L., Skyner, R., Snee, M., London, N., Walsh, M.A., von Delft, F.	1.65	34.24	306	2732
5RF1	PanDDA analysis group deposition -- Crystal Structure of SARS-CoV-2 main protease in complex with NCL-00023830	X-RAY DIFFRACTION	2020-03-25	HYDROLASE/HYDROLASE INHIBITOR	Fearon, D., Owen, C.D., Douangamath, A., Lukacik, P., Powell, A.J., Strain-Damerell, C.M., Resnick, E., Krojer, T., Gehrtz, P., Wild, C., Aimon, A., Brandao-Neto, J., Carbery, A., Dunnett, L., Skyner, R., Snee, M., London, N., Walsh, M.A., von Delft, F.	1.73	34.37	306	2731
5RF2	PanDDA analysis group deposition -- Crystal Structure of SARS-CoV-2 main protease in complex with Z1741969146	X-RAY DIFFRACTION	2020-03-25	HYDROLASE/HYDROLASE INHIBITOR	Fearon, D., Owen, C.D., Douangamath, A., Lukacik, P., Powell, A.J., Strain-Damerell, C.M., Resnick, E., Krojer, T., Gehrtz, P., Wild, C., Aimon, A., Brandao-Neto, J., Carbery, A., Dunnett, L., Skyner, R., Snee, M., London, N., Walsh, M.A., von Delft, F.	1.53	34.13	306	2722
5RF3	PanDDA analysis group deposition -- Crystal Structure of SARS-CoV-2 main protease in complex with Z1741970824	X-RAY DIFFRACTION	2020-03-25	HYDROLASE/HYDROLASE INHIBITOR	Fearon, D., Owen, C.D., Douangamath, A., Lukacik, P., Powell, A.J., Strain-Damerell, C.M., Resnick, E., Krojer, T., Gehrtz, P., Wild, C., Aimon, A., Brandao-Neto, J., Carbery, A., Dunnett, L., Skyner, R., Snee, M., London, N., Walsh, M.A., von Delft, F.	1.5	34.16	306	2724
5RF4	PanDDA analysis group deposition -- Crystal Structure of SARS-CoV-2 main protease in complex with Z1741982125	X-RAY DIFFRACTION	2020-03-25	HYDROLASE/HYDROLASE INHIBITOR	Fearon, D., Owen, C.D., Douangamath, A., Lukacik, P., Powell, A.J., Strain-Damerell, C.M., Resnick, E., Krojer, T., Gehrtz, P., Wild, C., Aimon, A., Brandao-Neto, J., Carbery, A., Dunnett, L., Skyner, R., Snee, M., London, N., Walsh, M.A., von Delft, F.	1.61	34.16	306	2795
5RF5	PanDDA analysis group deposition -- Crystal Structure of SARS-CoV-2 main protease in complex with Z3241250482	X-RAY DIFFRACTION	2020-03-25	HYDROLASE/HYDROLASE INHIBITOR	Fearon, D., Owen, C.D., Douangamath, A., Lukacik, P., Powell, A.J., Strain-Damerell, C.M., Resnick, E., Krojer, T., Gehrtz, P., Wild, C., Aimon, A., Brandao-Neto, J., Carbery, A., Dunnett, L., Skyner, R., Snee, M., London, N., Walsh, M.A., von Delft, F.	1.74	34.18	306	2725
5RF6	PanDDA analysis group deposition -- Crystal Structure of SARS-CoV-2 main protease in complex with Z1348371854	X-RAY DIFFRACTION	2020-03-25	HYDROLASE/HYDROLASE INHIBITOR	Fearon, D., Owen, C.D., Douangamath, A., Lukacik, P., Powell, A.J., Strain-Damerell, C.M., Resnick, E., Krojer, T., Gehrtz, P., Wild, C., Aimon, A., Brandao-Neto, J., Carbery, A., Dunnett, L., Skyner, R., Snee, M., London, N., Walsh, M.A., von Delft, F.	1.45	34.34	306	2731
5RF7	PanDDA analysis group deposition -- Crystal Structure of SARS-CoV-2 main protease in complex with Z316425948_minor	X-RAY DIFFRACTION	2020-03-25	HYDROLASE/HYDROLASE INHIBITOR	Fearon, D., Owen, C.D., Douangamath, A., Lukacik, P., Powell, A.J., Strain-Damerell, C.M., Resnick, E., Krojer, T., Gehrtz, P., Wild, C., Aimon, A., Brandao-Neto, J., Carbery, A., Dunnett, L., Skyner, R., Snee, M., London, N., Walsh, M.A., von Delft, F.	1.54	34.32	306	2787
5RF8	PanDDA analysis group deposition -- Crystal Structure of SARS-CoV-2 main protease in complex with Z271004858	X-RAY DIFFRACTION	2020-03-25	HYDROLASE/HYDROLASE INHIBITOR	Fearon, D., Owen, C.D., Douangamath, A., Lukacik, P., Powell, A.J., Strain-Damerell, C.M., Resnick, E., Krojer, T., Gehrtz, P., Wild, C., Aimon, A., Brandao-Neto, J., Carbery, A., Dunnett, L., Skyner, R., Snee, M., London, N., Walsh, M.A., von Delft, F.	1.44	34.31	306	2735
5RF9	PanDDA analysis group deposition -- Crystal Structure of SARS-CoV-2 main protease in complex with Z217038356	X-RAY DIFFRACTION	2020-03-25	HYDROLASE/HYDROLASE INHIBITOR	Fearon, D., Owen, C.D., Douangamath, A., Lukacik, P., Powell, A.J., Strain-Damerell, C.M., Resnick, E., Krojer, T., Gehrtz, P., Wild, C., Aimon, A., Brandao-Neto, J., Carbery, A., Dunnett, L., Skyner, R., Snee, M., London, N., Walsh, M.A., von Delft, F.	1.43	34.27	306	2735
5RFA	PanDDA analysis group deposition -- Crystal Structure of SARS-CoV-2 main protease in complex with Z2643472210	X-RAY DIFFRACTION	2020-03-25	HYDROLASE/HYDROLASE INHIBITOR	Fearon, D., Owen, C.D., Douangamath, A., Lukacik, P., Powell, A.J., Strain-Damerell, C.M., Resnick, E., Krojer, T., Gehrtz, P., Wild, C., Aimon, A., Brandao-Neto, J., Carbery, A., Dunnett, L., Skyner, R., Snee, M., London, N., Walsh, M.A., von Delft, F.	1.52	34.19	306	2763
5RFB	PanDDA analysis group deposition -- Crystal Structure of SARS-CoV-2 main protease in complex with Z1271660837	X-RAY DIFFRACTION	2020-03-25	HYDROLASE/HYDROLASE INHIBITOR	Fearon, D., Owen, C.D., Douangamath, A., Lukacik, P., Powell, A.J., Strain-Damerell, C.M., Resnick, E., Krojer, T., Gehrtz, P., Wild, C., Aimon, A., Brandao-Neto, J., Carbery, A., Dunnett, L., Skyner, R., Snee, M., London, N., Walsh, M.A., von Delft, F.	1.48	34.2	306	2724
5RFC	PanDDA analysis group deposition -- Crystal Structure of SARS-CoV-2 main protease in complex with Z979145504	X-RAY DIFFRACTION	2020-03-25	HYDROLASE/HYDROLASE INHIBITOR	Fearon, D., Owen, C.D., Douangamath, A., Lukacik, P., Powell, A.J., Strain-Damerell, C.M., Resnick, E., Krojer, T., Gehrtz, P., Wild, C., Aimon, A., Brandao-Neto, J., Carbery, A., Dunnett, L., Skyner, R., Snee, M., London, N., Walsh, M.A., von Delft, F.	1.4	34.31	306	2788
5RFD	PanDDA analysis group deposition -- Crystal Structure of SARS-CoV-2 main protease in complex with Z126932614	X-RAY DIFFRACTION	2020-03-25	HYDROLASE/HYDROLASE INHIBITOR	Fearon, D., Owen, C.D., Douangamath, A., Lukacik, P., Powell, A.J., Strain-Damerell, C.M., Resnick, E., Krojer, T., Gehrtz, P., Wild, C., Aimon, A., Brandao-Neto, J., Carbery, A., Dunnett, L., Skyner, R., Snee, M., London, N., Walsh, M.A., von Delft, F.	1.41	34.27	306	2728
5RFE	PanDDA analysis group deposition -- Crystal Structure of SARS-CoV-2 main protease in complex with Z509756472	X-RAY DIFFRACTION	2020-03-25	HYDROLASE/HYDROLASE INHIBITOR	Fearon, D., Owen, C.D., Douangamath, A., Lukacik, P., Powell, A.J., Strain-Damerell, C.M., Resnick, E., Krojer, T., Gehrtz, P., Wild, C., Aimon, A., Brandao-Neto, J., Carbery, A., Dunnett, L., Skyner, R., Snee, M., London, N., Walsh, M.A., von Delft, F.	1.46	34.31	306	2786
5RFF	PanDDA analysis group deposition -- Crystal Structure of SARS-CoV-2 main protease in complex with PCM-0102704	X-RAY DIFFRACTION	2020-03-25	HYDROLASE/HYDROLASE INHIBITOR	Fearon, D., Owen, C.D., Douangamath, A., Lukacik, P., Powell, A.J., Strain-Damerell, C.M., Resnick, E., Krojer, T., Gehrtz, P., Wild, C., Aimon, A., Brandao-Neto, J., Carbery, A., Dunnett, L., Skyner, R., Snee, M., London, N., Walsh, M.A., von Delft, F.	1.78	34.36	306	2719
5RFG	PanDDA analysis group deposition -- Crystal Structure of SARS-CoV-2 main protease in complex with PCM-0102372	X-RAY DIFFRACTION	2020-03-25	HYDROLASE/HYDROLASE INHIBITOR	Fearon, D., Owen, C.D., Douangamath, A., Lukacik, P., Powell, A.J., Strain-Damerell, C.M., Resnick, E., Krojer, T., Gehrtz, P., Wild, C., Aimon, A., Brandao-Neto, J., Carbery, A., Dunnett, L., Skyner, R., Snee, M., London, N., Walsh, M.A., von Delft, F.	2.32	34.31	306	2834
5RFH	PanDDA analysis group deposition -- Crystal Structure of SARS-CoV-2 main protease in complex with PCM-0102277	X-RAY DIFFRACTION	2020-03-25	HYDROLASE/HYDROLASE INHIBITOR	Fearon, D., Owen, C.D., Douangamath, A., Lukacik, P., Powell, A.J., Strain-Damerell, C.M., Resnick, E., Krojer, T., Gehrtz, P., Wild, C., Aimon, A., Brandao-Neto, J., Carbery, A., Dunnett, L., Skyner, R., Snee, M., London, N., Walsh, M.A., von Delft, F.	1.58	34.32	306	2728
5RFI	PanDDA analysis group deposition -- Crystal Structure of SARS-CoV-2 main protease in complex with PCM-0102353	X-RAY DIFFRACTION	2020-03-25	HYDROLASE/HYDROLASE INHIBITOR	Fearon, D., Owen, C.D., Douangamath, A., Lukacik, P., Powell, A.J., Strain-Damerell, C.M., Resnick, E., Krojer, T., Gehrtz, P., Wild, C., Aimon, A., Brandao-Neto, J., Carbery, A., Dunnett, L., Skyner, R., Snee, M., London, N., Walsh, M.A., von Delft, F.	1.69	34.36	306	2789
5RFJ	PanDDA analysis group deposition -- Crystal Structure of SARS-CoV-2 main protease in complex with PCM-0103067	X-RAY DIFFRACTION	2020-03-25	HYDROLASE/HYDROLASE INHIBITOR	Fearon, D., Owen, C.D., Douangamath, A., Lukacik, P., Powell, A.J., Strain-Damerell, C.M., Resnick, E., Krojer, T., Gehrtz, P., Wild, C., Aimon, A., Brandao-Neto, J., Carbery, A., Dunnett, L., Skyner, R., Snee, M., London, N., Walsh, M.A., von Delft, F.	1.8	34.28	306	2787
5RFK	PanDDA analysis group deposition -- Crystal Structure of SARS-CoV-2 main protease in complex with PCM-0102575	X-RAY DIFFRACTION	2020-03-25	HYDROLASE/HYDROLASE INHIBITOR	Fearon, D., Owen, C.D., Douangamath, A., Lukacik, P., Powell, A.J., Strain-Damerell, C.M., Resnick, E., Krojer, T., Gehrtz, P., Wild, C., Aimon, A., Brandao-Neto, J., Carbery, A., Dunnett, L., Skyner, R., Snee, M., London, N., Walsh, M.A., von Delft, F.	1.75	34.31	306	2737
5RFL	PanDDA analysis group deposition -- Crystal Structure of SARS-CoV-2 main protease in complex with PCM-0102389	X-RAY DIFFRACTION	2020-03-25	HYDROLASE/HYDROLASE INHIBITOR	Fearon, D., Owen, C.D., Douangamath, A., Lukacik, P., Powell, A.J., Strain-Damerell, C.M., Resnick, E., Krojer, T., Gehrtz, P., Wild, C., Aimon, A., Brandao-Neto, J., Carbery, A., Dunnett, L., Skyner, R., Snee, M., London, N., Walsh, M.A., von Delft, F.	1.64	34.32	306	2729
5RFM	PanDDA analysis group deposition -- Crystal Structure of SARS-CoV-2 main protease in complex with PCM-0102539	X-RAY DIFFRACTION	2020-03-25	HYDROLASE/HYDROLASE INHIBITOR	Fearon, D., Owen, C.D., Douangamath, A., Lukacik, P., Powell, A.J., Strain-Damerell, C.M., Resnick, E., Krojer, T., Gehrtz, P., Wild, C., Aimon, A., Brandao-Neto, J., Carbery, A., Dunnett, L., Skyner, R., Snee, M., London, N., Walsh, M.A., von Delft, F.	2.06	34.33	306	2731
5RFN	PanDDA analysis group deposition -- Crystal Structure of SARS-CoV-2 main protease in complex with PCM-0102868	X-RAY DIFFRACTION	2020-03-25	HYDROLASE/HYDROLASE INHIBITOR	Fearon, D., Owen, C.D., Douangamath, A., Lukacik, P., Powell, A.J., Strain-Damerell, C.M., Resnick, E., Krojer, T., Gehrtz, P., Wild, C., Aimon, A., Brandao-Neto, J., Carbery, A., Dunnett, L., Skyner, R., Snee, M., London, N., Walsh, M.A., von Delft, F.	1.8	34.33	306	2736
5RFO	PanDDA analysis group deposition -- Crystal Structure of SARS-CoV-2 main protease in complex with PCM-0102972	X-RAY DIFFRACTION	2020-03-25	HYDROLASE/HYDROLASE INHIBITOR	Fearon, D., Owen, C.D., Douangamath, A., Lukacik, P., Powell, A.J., Strain-Damerell, C.M., Resnick, E., Krojer, T., Gehrtz, P., Wild, C., Aimon, A., Brandao-Neto, J., Carbery, A., Dunnett, L., Skyner, R., Snee, M., London, N., Walsh, M.A., von Delft, F.	1.83	34.3	306	2729
5RFP	PanDDA analysis group deposition -- Crystal Structure of SARS-CoV-2 main protease in complex with PCM-0102190	X-RAY DIFFRACTION	2020-03-25	HYDROLASE/HYDROLASE INHIBITOR	Fearon, D., Owen, C.D., Douangamath, A., Lukacik, P., Powell, A.J., Strain-Damerell, C.M., Resnick, E., Krojer, T., Gehrtz, P., Wild, C., Aimon, A., Brandao-Neto, J., Carbery, A., Dunnett, L., Skyner, R., Snee, M., London, N., Walsh, M.A., von Delft, F.	2.03	34.34	306	2731
5RFQ	PanDDA analysis group deposition -- Crystal Structure of SARS-CoV-2 main protease in complex with PCM-0102179	X-RAY DIFFRACTION	2020-03-25	HYDROLASE/HYDROLASE INHIBITOR	Fearon, D., Owen, C.D., Douangamath, A., Lukacik, P., Powell, A.J., Strain-Damerell, C.M., Resnick, E., Krojer, T., Gehrtz, P., Wild, C., Aimon, A., Brandao-Neto, J., Carbery, A., Dunnett, L., Skyner, R., Snee, M., London, N., Walsh, M.A., von Delft, F.	1.76	34.36	306	2739
5RFR	PanDDA analysis group deposition -- Crystal Structure of SARS-CoV-2 main protease in complex with PCM-0102169	X-RAY DIFFRACTION	2020-03-25	HYDROLASE/HYDROLASE INHIBITOR	Fearon, D., Owen, C.D., Douangamath, A., Lukacik, P., Powell, A.J., Strain-Damerell, C.M., Resnick, E., Krojer, T., Gehrtz, P., Wild, C., Aimon, A., Brandao-Neto, J., Carbery, A., Dunnett, L., Skyner, R., Snee, M., London, N., Walsh, M.A., von Delft, F.	1.71	34.36	306	2731
5RFS	PanDDA analysis group deposition -- Crystal Structure of SARS-CoV-2 main protease in complex with PCM-0102739	X-RAY DIFFRACTION	2020-03-25	HYDROLASE/HYDROLASE INHIBITOR	Fearon, D., Owen, C.D., Douangamath, A., Lukacik, P., Powell, A.J., Strain-Damerell, C.M., Resnick, E., Krojer, T., Gehrtz, P., Wild, C., Aimon, A., Brandao-Neto, J., Carbery, A., Dunnett, L., Skyner, R., Snee, M., London, N., Walsh, M.A., von Delft, F.	1.7	34.36	306	2785
5RFT	PanDDA analysis group deposition -- Crystal Structure of SARS-CoV-2 main protease in complex with PCM-0102432	X-RAY DIFFRACTION	2020-03-25	HYDROLASE/HYDROLASE INHIBITOR	Fearon, D., Owen, C.D., Douangamath, A., Lukacik, P., Powell, A.J., Strain-Damerell, C.M., Resnick, E., Krojer, T., Gehrtz, P., Wild, C., Aimon, A., Brandao-Neto, J., Carbery, A., Dunnett, L., Skyner, R., Snee, M., London, N., Walsh, M.A., von Delft, F.	1.58	34.31	306	2730
5RFU	PanDDA analysis group deposition -- Crystal Structure of SARS-CoV-2 main protease in complex with PCM-0102121	X-RAY DIFFRACTION	2020-03-25	HYDROLASE/HYDROLASE INHIBITOR	Fearon, D., Owen, C.D., Douangamath, A., Lukacik, P., Powell, A.J., Strain-Damerell, C.M., Resnick, E., Krojer, T., Gehrtz, P., Wild, C., Aimon, A., Brandao-Neto, J., Carbery, A., Dunnett, L., Skyner, R., Snee, M., London, N., Walsh, M.A., von Delft, F.	1.53	34.45	306	2743
5RFV	PanDDA analysis group deposition -- Crystal Structure of SARS-CoV-2 main protease in complex with PCM-0102306	X-RAY DIFFRACTION	2020-03-25	HYDROLASE/HYDROLASE INHIBITOR	Fearon, D., Owen, C.D., Douangamath, A., Lukacik, P., Powell, A.J., Strain-Damerell, C.M., Resnick, E., Krojer, T., Gehrtz, P., Wild, C., Aimon, A., Brandao-Neto, J., Carbery, A., Dunnett, L., Skyner, R., Snee, M., London, N., Walsh, M.A., von Delft, F.	1.48	34.3	306	2733
5RFW	PanDDA analysis group deposition -- Crystal Structure of SARS-CoV-2 main protease in complex with PCM-0102243	X-RAY DIFFRACTION	2020-03-25	HYDROLASE/HYDROLASE INHIBITOR	Fearon, D., Owen, C.D., Douangamath, A., Lukacik, P., Powell, A.J., Strain-Damerell, C.M., Resnick, E., Krojer, T., Gehrtz, P., Wild, C., Aimon, A., Brandao-Neto, J., Carbery, A., Dunnett, L., Skyner, R., Snee, M., London, N., Walsh, M.A., von Delft, F.	1.43	34.36	306	2738
5RFX	PanDDA analysis group deposition -- Crystal Structure of SARS-CoV-2 main protease in complex with PCM-0102254	X-RAY DIFFRACTION	2020-03-25	HYDROLASE/HYDROLASE INHIBITOR	Fearon, D., Owen, C.D., Douangamath, A., Lukacik, P., Powell, A.J., Strain-Damerell, C.M., Resnick, E., Krojer, T., Gehrtz, P., Wild, C., Aimon, A., Brandao-Neto, J., Carbery, A., Dunnett, L., Skyner, R., Snee, M., London, N., Walsh, M.A., von Delft, F.	1.55	34.29	306	2786
5RFY	PanDDA analysis group deposition -- Crystal Structure of SARS-CoV-2 main protease in complex with PCM-0102974	X-RAY DIFFRACTION	2020-03-25	HYDROLASE/HYDROLASE INHIBITOR	Fearon, D., Owen, C.D., Douangamath, A., Lukacik, P., Powell, A.J., Strain-Damerell, C.M., Resnick, E., Krojer, T., Gehrtz, P., Wild, C., Aimon, A., Brandao-Neto, J., Carbery, A., Dunnett, L., Skyner, R., Snee, M., London, N., Walsh, M.A., von Delft, F.	1.9	34.29	306	2739
5RFZ	PanDDA analysis group deposition -- Crystal Structure of SARS-CoV-2 main protease in complex with PCM-0102274	X-RAY DIFFRACTION	2020-03-25	HYDROLASE/HYDROLASE INHIBITOR	Fearon, D., Owen, C.D., Douangamath, A., Lukacik, P., Powell, A.J., Strain-Damerell, C.M., Resnick, E., Krojer, T., Gehrtz, P., Wild, C., Aimon, A., Brandao-Neto, J., Carbery, A., Dunnett, L., Skyner, R., Snee, M., London, N., Walsh, M.A., von Delft, F.	1.68	34.39	306	2842
5RG0	PanDDA analysis group deposition -- Crystal Structure of SARS-CoV-2 main protease in complex with PCM-0102535	X-RAY DIFFRACTION	2020-03-25	HYDROLASE/HYDROLASE INHIBITOR	Fearon, D., Owen, C.D., Douangamath, A., Lukacik, P., Powell, A.J., Strain-Damerell, C.M., Resnick, E., Krojer, T., Gehrtz, P., Wild, C., Aimon, A., Brandao-Neto, J., Carbery, A., Dunnett, L., Skyner, R., Snee, M., London, N., Walsh, M.A., von Delft, F.	1.72	34.31	306	2795
6L5T	The crystal structure of SADS-CoV Papain Like protease	X-RAY DIFFRACTION	2020-04-08	HYDROLASE	Fan, C.P.	1.72	31.62	293	2000
6LVN	Structure of the 2019-nCoV HR2 Domain	X-RAY DIFFRACTION	2020-02-26	VIRAL PROTEIN	Zhu, Y., Sun, F.	2.47	16.05	144	1078
6LXT	Structure of post fusion core of 2019-nCoV S2 subunit	X-RAY DIFFRACTION	2020-02-26	VIRAL PROTEIN	Zhu, Y., Sun, F.	2.9	84.66	792	5237
6LZG	Structure of novel coronavirus spike receptor-binding domain complexed with its receptor ACE2	X-RAY DIFFRACTION	2020-03-18	VIRAL PROTEIN	Wang, Q.H., Song, H., Qi, J.X.	2.5	96.06	826	6784
6M03	The crystal structure of COVID-19 main protease in apo form	X-RAY DIFFRACTION	2020-03-11	BIOSYNTHETIC PROTEIN	Zhang, B., Zhao, Y., Jin, Z., Liu, X., Yang, H., Rao, Z.	2	33.83	306	2454
6M0J	Crystal structure of SARS-CoV-2 spike receptor-binding domain bound with ACE2	X-RAY DIFFRACTION	2020-03-18	VIRAL PROTEIN/HYDROLASE	Wang, X., Lan, J., Ge, J., Yu, J., Shan, S.	2.45	97.14	832	6571
6M17	The 2019-nCoV RBD/ACE2-B0AT1 complex	ELECTRON MICROSCOPY	2020-03-11	MEMBRANE PROTEIN/VIRAL PROTEIN	Yan, R.H., Zhang, Y.Y., Li, Y.N., Xia, L., Guo, Y.Y., Zhou, Q.	2.9	394.46	3382	25344
6M18	ACE2-B0AT1 complex	ELECTRON MICROSCOPY	2020-03-11	MEMBRANE PROTEIN	Yan, R.H., Zhang, Y.Y., Li, Y.N., Xia, L., Zhou, Q.	2.9	345.45	2936	22534
6M1D	ACE2-B0AT1 complex, open conformation	ELECTRON MICROSCOPY	2020-03-11	MEMBRANE PROTEIN	Yan, R.H., Zhang, Y.Y., Li, Y.N., Xia, L., Zhou, Q.	4.5	334.09	2936	21776
6M3M	Crystal structure of SARS-CoV-2 nucleocapsid protein N-terminal RNA binding domain	X-RAY DIFFRACTION	2020-03-18	VIRAL PROTEIN	Chen, S., Kang, S.	2.7	59.58	544	3949
6M71	SARS-Cov-2 RNA-dependent RNA polymerase in complex with cofactors	ELECTRON MICROSCOPY	2020-04-01	VIRAL PROTEIN	Gao, Y., Yan, L., Huang, Y., Liu, F., Cao, L., Wang, T., Wang, Q., Lou, Z., Rao, Z.	2.9	161.22	1421	8541
6VSB	Prefusion 2019-nCoV spike glycoprotein with a single receptor-binding domain up	ELECTRON MICROSCOPY	2020-02-26	VIRAL PROTEIN	Wrapp, D., Wang, N., Corbett, K.S., Goldsmith, J.A., Hsieh, C., Abiona, O., Graham, B.S., McLellan, J.S.	3.46	440.69	3864	22854
6VXX	Structure of the SARS-CoV-2 spike glycoprotein (closed state)	ELECTRON MICROSCOPY	2020-03-11	VIRAL PROTEIN	Walls, A.C., Park, Y.J., Tortorici, M.A., Wall, A., Seattle Structural Genomics Center for Infectious Disease (SSGCID), McGuire, A.T., Veesler, D.	2.8	438.53	3843	23694
6VYB	SARS-CoV-2 spike ectodomain structure (open state)	ELECTRON MICROSCOPY	2020-03-11	VIRAL PROTEIN	Walls, A.C., Park, Y.J., Tortorici, M.A., Wall, A., Seattle Structural Genomics Center for Infectious Disease (SSGCID), McGuire, A.T., Veesler, D.	3.2	437.65	3843	22365
6W01	The 1.9 A Crystal Structure of NSP15 Endoribonuclease from SARS CoV-2 in the Complex with a Citrate	X-RAY DIFFRACTION	2020-03-11	VIRAL PROTEIN	Kim, Y., Jedrzejczak, R., Maltseva, N., Endres, M., Godzik, A., Michalska, K., Joachimiak, A., Center for Structural Genomics of Infectious Diseases (CSGID)	1.9	85.52	742	6253
6W02	Crystal Structure of ADP ribose phosphatase of NSP3 from SARS CoV-2 in the complex with ADP ribose	X-RAY DIFFRACTION	2020-03-11	VIRAL PROTEIN	Michalska, K., Kim, Y., Jedrzejczak, R., Maltseva, N., Endres, M., Mececar, A., Joachimiak, A., Center for Structural Genomics of Infectious Diseases (CSGID)	1.5	38.28	346	3016
6W41	Crystal structure of SARS-CoV-2 receptor binding domain in complex with human antibody CR3022	X-RAY DIFFRACTION	2020-03-25	IMMUNE SYSTEM/VIRAL PROTEIN	Yuan, M., Wu, N.C., Zhu, X.Y., Wilson, I.A.	3.084	74.43	674	4936
6W4B	The crystal structure of Nsp9 RNA binding protein of SARS CoV-2	X-RAY DIFFRACTION	2020-03-18	REPLICATION, VIRAL PROTEIN	Tan, K., Kim, Y., Jedrzejczak, R., Maltseva, N., Endres, M., Michalska, K., Joachimiak, A., Center for Structural Genomics of Infectious Diseases (CSGID)	2.95	25.59	234	1685
6W4H	1.80 Angstrom Resolution Crystal Structure of NSP16 - NSP10 Complex from SARS-CoV-2	X-RAY DIFFRACTION	2020-03-18	VIRAL PROTEIN	Minasov, G., Shuvalova, L., Rosas-Lemus, M., Kiryukhina, O., Wiersum, G., Godzik, A., Jaroszewski, L., Stogios, P.J., Skarina, T., Satchell, K.J.F., Center for Structural Genomics of Infectious Diseases (CSGID)	1.8	49.79	443	4073
6W61	Crystal Structure of the methyltransferase-stimulatory factor complex of NSP16 and NSP10 from SARS CoV-2.	X-RAY DIFFRACTION	2020-03-25	VIRAL PROTEIN	Kim, Y., Jedrzejczak, R., Maltseva, N., Endres, M., Godzik, A., Joachimiak, A., Center for Structural Genomics of Infectious Diseases (CSGID)	2	49.21	439	3530
6W63	Structure of COVID-19 main protease bound to potent broad-spectrum non-covalent inhibitor X77	X-RAY DIFFRACTION	2020-03-25	VIRAL PROTEIN/INHIBITOR	Mesecar, A.D., Center for Structural Genomics of Infectious Diseases (CSGID)	2.1	34.29	306	4995
6W6Y	Crystal Structure of ADP ribose phosphatase of NSP3 from SARS CoV-2 in complex with AMP	X-RAY DIFFRACTION	2020-03-25	VIRAL PROTEIN, HYDROLASE	Michalska, K., Kim, Y., Jedrzejczak, R., Maltseva, N., Endres, M., Mececar, A., Joachimiak, A., Center for Structural Genomics of Infectious Diseases (CSGID)	1.451	37.09	340	2906
6W75	1.95 Angstrom Resolution Crystal Structure of NSP10 - NSP16 Complex from SARS-CoV-2	X-RAY DIFFRACTION	2020-03-25	VIRAL PROTEIN	Minasov, G., Shuvalova, L., Rosas-Lemus, M., Kiryukhina, O., Wiersum, G., Godzik, A., Jaroszewski, L., Stogios, P.J., Skarina, T., Satchell, K.J.F., Center for Structural Genomics of Infectious Diseases (CSGID)	1.951	99.55	886	7676
6W9C	The crystal structure of papain-like protease of SARS CoV-2	X-RAY DIFFRACTION	2020-04-01	HYDROLASE	Osipiuk, J., Jedrzejczak, R., Tesar, C., Endres, M., Stols, L., Babnigg, G., Kim, Y., Michalska, K., Joachimiak, A., Center for Structural Genomics of Infectious Diseases (CSGID)	2.7	107.67	951	7397
6W9Q	Peptide-bound SARS-CoV-2 Nsp9 RNA-replicase	X-RAY DIFFRACTION	2020-04-08	VIRAL PROTEIN	Littler, D.R., Gully, B.S., Riboldi-Tunnicliffe, A., Rossjohn, J.	2.05	14.69	133	949
6WAQ	Crystal structure of the SARS-CoV-1 RBD bound by the cross-reactive single-domain antibody SARS VHH-72	X-RAY DIFFRACTION	2020-04-01	VIRAL PROTEIN/IMMUNE SYSTEM	Wrapp, D., McLellan, J.S.	2.2	71.68	636	5077
6WAR	Crystal structure of the MERS-CoV RBD bound by the neutralizing single-domain antibody MERS VHH-55	X-RAY DIFFRACTION	2020-04-08	VIRAL PROTEIN/IMMUNE SYSTEM	Wrapp, D., Torres, G.M., McLellan, J.S.	3.4	312.84	2872	20212
6Y7M	Crystal structure of the complex resulting from the reaction between the SARS-CoV main protease and tert-butyl (1-((S)-3-cyclohexyl-1-(((S)-4-(cyclopropylamino)-3,4-dioxo-1-((S)-2-oxopyrrolidin-3-yl)butan-2-yl)amino)-1-oxopropan-2-yl)-2-oxo-1,2-dihydropyridin-3-yl)carbamate	X-RAY DIFFRACTION	2020-03-18	VIRAL PROTEIN	Zhang, L., Lin, D., Hilgenfeld, R.	1.9	34.54	306	2622
6Y84	SARS-CoV-2 main protease with unliganded active site (2019-nCoV, coronavirus disease 2019, COVID-19)	X-RAY DIFFRACTION	2020-03-11	VIRAL PROTEIN	Owen, C.D., Lukacik, P., Strain-Damerell, C.M., Douangamath, A., Powell, A.J., Fearon, D., Brandao-Neto, J., Crawshaw, A.D., Aragao, D., Williams, M., Flaig, R., Hall, D.R., McAuley, K.E., Mazzorana, M., Stuart, D.I., von Delft, F., Walsh, M.A.	1.39	34.14	306	2950
6YB7	SARS-CoV-2 main protease with unliganded active site (2019-nCoV, coronavirus disease 2019, COVID-19)	X-RAY DIFFRACTION	2020-03-25	VIRAL PROTEIN	Owen, C.D., Lukacik, P., Strain-Damerell, C.M., Douangamath, A., Powell, A.J., Fearon, D., Brandao-Neto, J., Crawshaw, A.D., Aragao, D., Williams, M., Flaig, R., Hall, D.R., McAuley, K.E., Mazzorana, M., Stuart, D.I., von Delft, F., Walsh, M.A.	1.25	34.45	306	3047
6YI3	The N-terminal RNA-binding domain of the SARS-CoV-2 nucleocapsid phosphoprotein	SOLUTION NMR	2020-04-08	VIRAL PROTEIN	Veverka, V., Boura, E.		15.13	140	2107
7BTF	SARS-CoV-2 RNA-dependent RNA polymerase in complex with cofactors in reduced condition	ELECTRON MICROSCOPY	2020-04-08	VIRAL PROTEIN	Gao, Y., Yan, L., Huang, Y., Liu, F., Cao, L., Wang, T., Wang, Q., Lou, Z., Rao, Z.	2.95	161.35	1421	9783

## Sheet: Supplementary_Table 2
Supplementary Table2: The amino acids participating in active site formation and related descriptors of novel coronavirus spike receptor binding domain(6LZG)
Atom_6LZG	Atom number	Atom name	Residue name	Chain	Residue number		Size and shape descriptors
ATOM	44	CD2	PHE	B	338		volume [Å³]	387.97
ATOM	47	CZ	PHE	B	338		surface [Å²]	715.77
ATOM	55	O	GLU	B	340		depth [Å]	19.15
ATOM	62	CA	VAL	B	341		ellipsoid main axis ratio c/a	0.04
ATOM	64	O	VAL	B	341		ellipsoid main axis ratio b/a	0.13
ATOM	66	CG1	VAL	B	341		enclosure	0.24
ATOM	67	CG2	VAL	B	341
ATOM	71	O	PHE	B	342		Functional group descriptors
ATOM	72	CB	PHE	B	342		hydrogen bond donors	9
ATOM	74	CD1	PHE	B	342		hydrogen bond acceptors	24
ATOM	85	OD1	ASN	B	343		metals	0
ATOM	86	ND2	ASN	B	343		hydrophobic interactions	39
ATOM	91	CB	ALA	B	344		hydrophobicity ratio	0.54
ATOM	102	O	ARG	B	346
ATOM	111	CA	PHE	B	347		Amino acid composition
ATOM	116	CD1	PHE	B	347		apolar amino acid ratio	0.58
ATOM	118	CE1	PHE	B	347		polar amino acid ratio	0.32
ATOM	121	N	ALA	B	348		positive amino acid ratio	0.05
ATOM	127	CA	SER	B	349		negative amino acid ratio	0.05
ATOM	140	CA	TYR	B	351
ATOM	142	O	TYR	B	351
ATOM	143	CB	TYR	B	351
ATOM	174	CB	ASN	B	354
ATOM	175	CG	ASN	B	354
ATOM	177	ND2	ASN	B	354
ATOM	187	NH1	ARG	B	355
ATOM	188	NH2	ARG	B	355
ATOM	193	CB	LYS	B	356
ATOM	215	CG2	ILE	B	358
ATOM	248	CB	ALA	B	363
ATOM	251	C	ASP	B	364
ATOM	252	O	ASP	B	364
ATOM	258	CA	TYR	B	365
ATOM	259	C	TYR	B	365
ATOM	260	O	TYR	B	365
ATOM	261	CB	TYR	B	365
ATOM	262	CG	TYR	B	365
ATOM	263	CD1	TYR	B	365
ATOM	264	CD2	TYR	B	365
ATOM	266	CE2	TYR	B	365
ATOM	268	OH	TYR	B	365
ATOM	268	OH	TYR	B	365
ATOM	269	N	SER	B	366
ATOM	270	CA	SER	B	366
ATOM	270	CA	SER	B	366
ATOM	273	CB	SER	B	366
ATOM	274	OG	SER	B	366
ATOM	274	OG	SER	B	366
ATOM	287	CG	LEU	B	368
ATOM	288	CD1	LEU	B	368
ATOM	288	CD1	LEU	B	368
ATOM	294	CB	TYR	B	369
ATOM	294	CB	TYR	B	369
ATOM	297	CD2	TYR	B	369
ATOM	315	OG	SER	B	371
ATOM	324	O	SER	B	373
ATOM	325	CB	SER	B	373
ATOM	326	OG	SER	B	373
ATOM	334	CD2	PHE	B	374
ATOM	336	CE2	PHE	B	374
ATOM	337	CZ	PHE	B	374
ATOM	350	CG2	THR	B	376
ATOM	360	CE2	PHE	B	377
ATOM	361	CZ	PHE	B	377
ATOM	366	CB	LYS	B	378
ATOM	367	CG	LYS	B	378
ATOM	368	CD	LYS	B	378
ATOM	369	CE	LYS	B	378
ATOM	376	SG	CYS	B	379
ATOM	388	OH	TYR	B	380
ATOM	398	CG1	VAL	B	382
ATOM	399	CG2	VAL	B	382
ATOM	403	O	SER	B	383
ATOM	407	CA	PRO	B	384
ATOM	409	O	PRO	B	384
ATOM	409	O	PRO	B	384
ATOM	421	CA	LYS	B	386
ATOM	429	N	LEU	B	387
ATOM	430	CA	LEU	B	387
ATOM	431	C	LEU	B	387
ATOM	432	O	LEU	B	387
ATOM	433	CB	LEU	B	387
ATOM	437	N	ASN	B	388
ATOM	438	CA	ASN	B	388
ATOM	441	CB	ASN	B	388
ATOM	442	CG	ASN	B	388
ATOM	443	OD1	ASN	B	388
ATOM	456	O	LEU	B	390
ATOM	457	CB	LEU	B	390
ATOM	474	CD2	PHE	B	392
ATOM	476	CE2	PHE	B	392
ATOM	497	CB	VAL	B	395
ATOM	498	CG1	VAL	B	395
ATOM	503	O	TYR	B	396
ATOM	504	CB	TYR	B	396
ATOM	506	CD1	TYR	B	396
ATOM	508	CE1	TYR	B	396
ATOM	515	O	ALA	B	397
ATOM	522	CG	ASP	B	398
ATOM	524	OD2	ASP	B	398
ATOM	530	OG	SER	B	399
ATOM	545	O	VAL	B	401
ATOM	563	CD	ARG	B	403
ATOM	592	O	VAL	B	407
ATOM	594	CG1	VAL	B	407
ATOM	597	CA	ARG	B	408
ATOM	599	O	ARG	B	408
ATOM	610	O	GLN	B	409
ATOM	617	CA	ILE	B	410
ATOM	619	O	ILE	B	410
ATOM	623	CD1	ILE	B	410
ATOM	624	N	ALA	B	411
ATOM	627	O	ALA	B	411
ATOM	628	CB	ALA	B	411
ATOM	644	CB	GLN	B	414
ATOM	680	O	ALA	B	419
ATOM	681	CB	ALA	B	419
ATOM	683	CA	ASP	B	420
ATOM	689	OD2	ASP	B	420
ATOM	693	O	TYR	B	421
ATOM	703	CA	ASN	B	422
ATOM	705	O	ASN	B	422
ATOM	713	O	TYR	B	423
ATOM	716	CD1	TYR	B	423
ATOM	717	CD2	TYR	B	423
ATOM	722	N	LYS	B	424
ATOM	723	CA	LYS	B	424
ATOM	727	CG	LYS	B	424
ATOM	728	CD	LYS	B	424
ATOM	728	CD	LYS	B	424
ATOM	729	CE	LYS	B	424
ATOM	730	NZ	LYS	B	424
ATOM	731	N	LEU	B	425
ATOM	735	CB	LEU	B	425
ATOM	736	CG	LEU	B	425
ATOM	789	SG	CYS	B	432
ATOM	794	CB	VAL	B	433
ATOM	795	CG1	VAL	B	433
ATOM	814	CB	TRP	B	436
ATOM	815	CG	TRP	B	436
ATOM	816	CD1	TRP	B	436
ATOM	817	CD2	TRP	B	436
ATOM	818	NE1	TRP	B	436
ATOM	819	CE2	TRP	B	436
ATOM	821	CZ2	TRP	B	436
ATOM	890	CG1	VAL	B	445
ATOM	891	CG2	VAL	B	445
ATOM	932	CB	TYR	B	451
ATOM	943	O	LEU	B	452
ATOM	967	NE	ARG	B	454
ATOM	969	NH1	ARG	B	454
ATOM	975	CB	LEU	B	455
ATOM	978	CD2	LEU	B	455
ATOM	982	O	PHE	B	456
ATOM	991	CA	ARG	B	457
ATOM	995	CG	ARG	B	457
ATOM	1001	N	LYS	B	458
ATOM	1006	CG	LYS	B	458
ATOM	1007	CD	LYS	B	458
ATOM	1008	CE	LYS	B	458
ATOM	1009	NZ	LYS	B	458
ATOM	1020	CB	ASN	B	460
ATOM	1023	ND2	ASN	B	460
ATOM	1027	O	LEU	B	461
ATOM	1030	CD1	LEU	B	461
ATOM	1049	CA	PHE	B	464
ATOM	1054	CD1	PHE	B	464
ATOM	1056	CE1	PHE	B	464
ATOM	1058	CZ	PHE	B	464
ATOM	1062	O	GLU	B	465
ATOM	1079	N	ASP	B	467
ATOM	1082	O	ASP	B	467
ATOM	1083	CB	ASP	B	467
ATOM	1085	OD1	ASP	B	467
ATOM	1099	CB	SER	B	469
ATOM	1100	OG	SER	B	469
ATOM	1108	N	GLU	B	471
ATOM	1111	O	GLU	B	471
ATOM	1112	CB	GLU	B	471
ATOM	1113	CG	GLU	B	471
ATOM	1114	CD	GLU	B	471
ATOM	1115	OE1	GLU	B	471
ATOM	1116	OE2	GLU	B	471
ATOM	1120	O	ILE	B	472
ATOM	1126	CA	TYR	B	473
ATOM	1129	CB	TYR	B	473
ATOM	1131	CD1	TYR	B	473
ATOM	1133	CE1	TYR	B	473
ATOM	1137	N	GLN	B	474
ATOM	1140	O	GLN	B	474
ATOM	1141	CB	GLN	B	474
ATOM	1142	CG	GLN	B	474
ATOM	1144	OE1	GLN	B	474
ATOM	1151	N	GLY	B	476
ATOM	1152	CA	GLY	B	476
ATOM	1164	O	THR	B	478
ATOM	1166	OG1	THR	B	478
ATOM	1216	O	PHE	B	486
ATOM	1227	O	ASN	B	487
ATOM	1228	CB	ASN	B	487
ATOM	1237	SG	CYS	B	488
ATOM	1253	O	PHE	B	490
ATOM	1263	C	PRO	B	491
ATOM	1265	CB	PRO	B	491
ATOM	1266	CG	PRO	B	491
ATOM	1270	C	LEU	B	492
ATOM	1271	O	LEU	B	492
ATOM	1280	CB	GLN	B	493
ATOM	1283	OE1	GLN	B	493
ATOM	1292	CA	TYR	B	495
ATOM	1295	CB	TYR	B	495
ATOM	1298	CD2	TYR	B	495
ATOM	1303	N	GLY	B	496
ATOM	1306	O	GLY	B	496
ATOM	1308	CA	PHE	B	497
ATOM	1314	CD2	PHE	B	497
ATOM	1314	CD2	PHE	B	497
ATOM	1316	CE2	PHE	B	497
ATOM	1321	O	GLN	B	498
ATOM	1332	CG	PRO	B	499
ATOM	1339	OG1	THR	B	500
ATOM	1340	CG2	THR	B	500
ATOM	1347	OD1	ASN	B	501
ATOM	1347	OD1	ASN	B	501
ATOM	1367	O	TYR	B	505
ATOM	1368	CB	TYR	B	505
ATOM	1371	CD2	TYR	B	505
ATOM	1377	CA	GLN	B	506
ATOM	1391	CD	PRO	B	507
ATOM	1432	O	VAL	B	512
ATOM	1434	CG1	VAL	B	512
ATOM	1442	CD1	LEU	B	513
ATOM	1448	CB	SER	B	514
ATOM	1448	CB	SER	B	514
ATOM	1449	OG	SER	B	514
ATOM	1458	CE1	PHE	B	515
ATOM	1460	CZ	PHE	B	515
ATOM	1465	CB	GLU	B	516
ATOM	1466	CG	GLU	B	516
ATOM	1467	CD	GLU	B	516
ATOM	1468	OE1	GLU	B	516
ATOM	1472	C	LEU	B	517
ATOM	1473	O	LEU	B	517
ATOM	1475	CG	LEU	B	517
ATOM	1477	CD2	LEU	B	517
ATOM	1480	C	LEU	B	518
ATOM	1493	CD2	HIS	B	519
ATOM	1523	O	VAL	B	524
ATOM	1525	CG1	VAL	B	524
ATOM	1530	O	CYS	B	525

## Sheet: Supplemenary_Table 3
Supplementary Table 3: The amino acids participating in active site formation and related descriptors of main protease (6LU7)
Atom_6LU7	Atom number	Atom name	Residue name	Chain	Residue number		Size and shape descriptors
ATOM	2	CA	SER	A	1		volume [Å³]	634.24
ATOM	5	CB	SER	A	1		surface [Å²]	995.93
ATOM	10	O	GLY	A	2		depth [Å]	17.01
ATOM	34	CA	LYS	A	5		ellipsoid main axis ratio c/a	0.11
ATOM	38	CG	LYS	A	5		ellipsoid main axis ratio b/a	0.37
ATOM	38	CG	LYS	A	5		enclosure	0.14
ATOM	39	CD	LYS	A	5
ATOM	42	N	MET	A	6		Functional group descriptors
ATOM	45	O	MET	A	6		hydrogen bond donors	21
ATOM	46	CB	MET	A	6		hydrogen bond acceptors	43
ATOM	64	CE2	PHE	A	8		metals	0
ATOM	65	CZ	PHE	A	8		hydrophobic interactions	61
ATOM	69	O	PRO	A	9		hydrophobicity ratio	0.49
ATOM	70	CB	PRO	A	9
ATOM	89	CD	LYS	A	12		Amino acid composition
ATOM	102	O	GLU	A	14		apolar amino acid ratio	0.45
ATOM	109	CA	GLY	A	15		polar amino acid ratio	0.3
ATOM	110	C	GLY	A	15		positive amino acid ratio	0.12
ATOM	111	O	GLY	A	15		negative amino acid ratio	0.12
ATOM	113	CA	CYS	A	16
ATOM	114	C	CYS	A	16
ATOM	121	O	MET	A	17
ATOM	121	O	MET	A	17
ATOM	127	CA	VAL	A	18
ATOM	131	CG1	VAL	A	18
ATOM	133	N	GLN	A	19
ATOM	136	O	GLN	A	19
ATOM	137	CB	GLN	A	19
ATOM	141	NE2	GLN	A	19
ATOM	154	OG1	THR	A	21
ATOM	168	C	THR	A	24
ATOM	169	O	THR	A	24
ATOM	171	OG1	THR	A	24
ATOM	174	CA	THR	A	25
ATOM	178	OG1	THR	A	25
ATOM	179	CG2	THR	A	25
ATOM	180	N	THR	A	26
ATOM	183	O	THR	A	26
ATOM	183	O	THR	A	26
ATOM	185	OG1	THR	A	26
ATOM	186	CG2	THR	A	26
ATOM	186	CG2	THR	A	26
ATOM	188	CA	LEU	A	27
ATOM	191	CB	LEU	A	27
ATOM	194	CD2	LEU	A	27
ATOM	225	CE3	TRP	A	31
ATOM	227	CZ3	TRP	A	31
ATOM	228	CH2	TRP	A	31
ATOM	276	CE2	TYR	A	37
ATOM	292	N	ARG	A	40
ATOM	297	CG	ARG	A	40
ATOM	302	NH2	ARG	A	40
ATOM	309	ND1	HIS	A	41
ATOM	310	CD2	HIS	A	41
ATOM	312	NE2	HIS	A	41
ATOM	335	CA	THR	A	45
ATOM	339	OG1	THR	A	45
ATOM	341	N	SER	A	46
ATOM	342	CA	SER	A	46
ATOM	346	OG	SER	A	46
ATOM	370	SD	MET	A	49
ATOM	371	CE	MET	A	49
ATOM	412	CE2	TYR	A	54
ATOM	484	C	ASN	A	63
ATOM	485	O	ASN	A	63
ATOM	491	CA	HIS	A	64
ATOM	493	O	HIS	A	64
ATOM	510	C	PHE	A	66
ATOM	511	O	PHE	A	66
ATOM	519	N	LEU	A	67
ATOM	520	CA	LEU	A	67
ATOM	522	O	LEU	A	67
ATOM	523	CB	LEU	A	67
ATOM	525	CD1	LEU	A	67
ATOM	537	O	GLN	A	69
ATOM	538	CB	GLN	A	69
ATOM	539	CG	GLN	A	69
ATOM	541	OE1	GLN	A	69
ATOM	542	NE2	GLN	A	69
ATOM	544	CA	ALA	A	70
ATOM	544	CA	ALA	A	70
ATOM	545	C	ALA	A	70
ATOM	546	O	ALA	A	70
ATOM	547	CB	ALA	A	70
ATOM	548	N	GLY	A	71
ATOM	548	N	GLY	A	71
ATOM	549	CA	GLY	A	71
ATOM	549	CA	GLY	A	71
ATOM	551	O	GLY	A	71
ATOM	553	CA	ASN	A	72
ATOM	554	C	ASN	A	72
ATOM	555	O	ASN	A	72
ATOM	564	CB	VAL	A	73
ATOM	565	CG1	VAL	A	73
ATOM	566	CG2	VAL	A	73
ATOM	575	NE2	GLN	A	74
ATOM	579	O	LEU	A	75
ATOM	583	CD2	LEU	A	75
ATOM	585	CA	ARG	A	76
ATOM	588	CB	ARG	A	76
ATOM	589	CG	ARG	A	76
ATOM	595	N	VAL	A	77
ATOM	598	O	VAL	A	77
ATOM	599	CB	VAL	A	77
ATOM	645	OE1	GLN	A	83
ATOM	735	OD1	ASN	A	95
ATOM	742	CG	PRO	A	96
ATOM	743	CD	PRO	A	96
ATOM	749	CG	LYS	A	97
ATOM	751	CE	LYS	A	97
ATOM	752	NZ	LYS	A	97
ATOM	798	CA	PHE	A	103
ATOM	799	C	PHE	A	103
ATOM	801	CB	PHE	A	103
ATOM	806	CE2	PHE	A	103
ATOM	808	N	VAL	A	104
ATOM	810	C	VAL	A	104
ATOM	811	O	VAL	A	104
ATOM	814	CG2	VAL	A	104
ATOM	815	N	ARG	A	105
ATOM	819	CB	ARG	A	105
ATOM	829	O	ILE	A	106
ATOM	831	CG1	ILE	A	106
ATOM	833	CD1	ILE	A	106
ATOM	838	CB	GLN	A	107
ATOM	839	CG	GLN	A	107
ATOM	845	C	PRO	A	108
ATOM	846	O	PRO	A	108
ATOM	847	CB	PRO	A	108
ATOM	849	CD	PRO	A	108
ATOM	850	N	GLY	A	109
ATOM	851	CA	GLY	A	109
ATOM	852	C	GLY	A	109
ATOM	853	O	GLY	A	109
ATOM	859	CG	GLN	A	110
ATOM	861	OE1	GLN	A	110
ATOM	862	NE2	GLN	A	110
ATOM	863	N	THR	A	111
ATOM	866	O	THR	A	111
ATOM	868	OG1	THR	A	111
ATOM	869	CG2	THR	A	111
ATOM	869	CG2	THR	A	111
ATOM	878	CE1	PHE	A	112
ATOM	892	CG1	VAL	A	114
ATOM	914	CA	TYR	A	118
ATOM	917	CB	TYR	A	118
ATOM	925	N	ASN	A	119
ATOM	925	N	ASN	A	119
ATOM	926	CA	ASN	A	119
ATOM	928	O	ASN	A	119
ATOM	930	CG	ASN	A	119
ATOM	931	OD1	ASN	A	119
ATOM	931	OD1	ASN	A	119
ATOM	932	ND2	ASN	A	119
ATOM	934	CA	GLY	A	120
ATOM	936	O	GLY	A	120
ATOM	981	C	GLN	A	127
ATOM	982	O	GLN	A	127
ATOM	984	CG	GLN	A	127
ATOM	984	CG	GLN	A	127
ATOM	987	NE2	GLN	A	127
ATOM	987	NE2	GLN	A	127
ATOM	989	CA	CYS	A	128
ATOM	989	CA	CYS	A	128
ATOM	990	C	CYS	A	128
ATOM	993	SG	CYS	A	128
ATOM	994	N	ALA	A	129
ATOM	997	O	ALA	A	129
ATOM	998	CB	ALA	A	129
ATOM	1004	CG	MET	A	130
ATOM	1006	CE	MET	A	130
ATOM	1006	CE	MET	A	130
ATOM	1023	CG	PRO	A	132
ATOM	1036	O	PHE	A	134
ATOM	1039	CD1	PHE	A	134
ATOM	1041	CE1	PHE	A	134
ATOM	1045	CA	THR	A	135
ATOM	1056	CG1	ILE	A	136
ATOM	1057	CG2	ILE	A	136
ATOM	1059	N	LYS	A	137
ATOM	1062	O	LYS	A	137
ATOM	1063	CB	LYS	A	137
ATOM	1080	C	PHE	A	140
ATOM	1081	O	PHE	A	140
ATOM	1082	CB	PHE	A	140
ATOM	1088	CZ	PHE	A	140
ATOM	1090	CA	LEU	A	141
ATOM	1091	C	LEU	A	141
ATOM	1092	O	LEU	A	141
ATOM	1098	CA	ASN	A	142
ATOM	1099	C	ASN	A	142
ATOM	1101	CB	ASN	A	142
ATOM	1102	CG	ASN	A	142
ATOM	1103	OD1	ASN	A	142
ATOM	1104	ND2	ASN	A	142
ATOM	1105	N	GLY	A	143
ATOM	1106	CA	GLY	A	143
ATOM	1106	CA	GLY	A	143
ATOM	1106	CA	GLY	A	143
ATOM	1108	O	GLY	A	143
ATOM	1109	N	SER	A	144
ATOM	1114	OG	SER	A	144
ATOM	1115	N	CYS	A	145
ATOM	1119	CB	CYS	A	145
ATOM	1120	SG	CYS	A	145
ATOM	1127	C	SER	A	147
ATOM	1128	O	SER	A	147
ATOM	1129	CB	SER	A	147
ATOM	1133	C	VAL	A	148
ATOM	1157	CB	ASN	A	151
ATOM	1158	CG	ASN	A	151
ATOM	1159	OD1	ASN	A	151
ATOM	1160	ND2	ASN	A	151
ATOM	1160	ND2	ASN	A	151
ATOM	1163	C	ILE	A	152
ATOM	1164	O	ILE	A	152
ATOM	1168	CD1	ILE	A	152
ATOM	1169	N	ASP	A	153
ATOM	1170	CA	ASP	A	153
ATOM	1172	O	ASP	A	153
ATOM	1173	CB	ASP	A	153
ATOM	1174	CG	ASP	A	153
ATOM	1175	OD1	ASP	A	153
ATOM	1176	OD2	ASP	A	153
ATOM	1213	O	SER	A	158
ATOM	1214	CB	SER	A	158
ATOM	1219	O	PHE	A	159
ATOM	1231	CB	CYS	A	160
ATOM	1237	CB	TYR	A	161
ATOM	1240	CD2	TYR	A	161
ATOM	1241	CE1	TYR	A	161
ATOM	1242	CE2	TYR	A	161
ATOM	1257	CB	HIS	A	163
ATOM	1260	CD2	HIS	A	163
ATOM	1262	NE2	HIS	A	163
ATOM	1269	ND1	HIS	A	164
ATOM	1274	CA	MET	A	165
ATOM	1281	N	GLU	A	166
ATOM	1284	O	GLU	A	166
ATOM	1285	CB	GLU	A	166
ATOM	1287	CD	GLU	A	166
ATOM	1288	OE1	GLU	A	166
ATOM	1289	OE2	GLU	A	166
ATOM	1292	C	LEU	A	167
ATOM	1294	CB	LEU	A	167
ATOM	1296	CD1	LEU	A	167
ATOM	1298	N	PRO	A	168
ATOM	1299	CA	PRO	A	168
ATOM	1304	CD	PRO	A	168
ATOM	1310	OG1	THR	A	169
ATOM	1311	CG2	THR	A	169
ATOM	1326	O	HIS	A	172
ATOM	1330	CD2	HIS	A	172
ATOM	1334	CA	ALA	A	173
ATOM	1338	N	GLY	A	174
ATOM	1353	CB	ASP	A	176
ATOM	1356	OD2	ASP	A	176
ATOM	1357	N	LEU	A	177
ATOM	1360	O	LEU	A	177
ATOM	1361	CB	LEU	A	177
ATOM	1370	CG	GLU	A	178
ATOM	1372	OE1	GLU	A	178
ATOM	1401	CB	TYR	A	182
ATOM	1403	CD1	TYR	A	182
ATOM	1406	CE2	TYR	A	182
ATOM	1444	OD1	ASP	A	187
ATOM	1445	OD2	ASP	A	187
ATOM	1456	NH2	ARG	A	188
ATOM	1481	O	GLN	A	192
ATOM	1488	CA	ALA	A	193
ATOM	1492	N	ALA	A	194
ATOM	1535	CG1	ILE	A	200
ATOM	1536	CG2	ILE	A	200
ATOM	1538	N	THR	A	201
ATOM	1542	CB	THR	A	201
ATOM	1545	N	VAL	A	202
ATOM	1550	CG1	VAL	A	202
ATOM	1551	CG2	VAL	A	202
ATOM	1558	OD1	ASN	A	203
ATOM	1627	O	VAL	A	212
ATOM	1627	O	VAL	A	212
ATOM	1627	O	VAL	A	212
ATOM	1629	CG1	VAL	A	212
ATOM	1632	CA	ILE	A	213
ATOM	1636	CG1	ILE	A	213
ATOM	1637	CG2	ILE	A	213
ATOM	1638	CD1	ILE	A	213
ATOM	1640	CA	ASN	A	214
ATOM	1645	OD1	ASN	A	214
ATOM	1646	ND2	ASN	A	214
ATOM	1648	CA	GLY	A	215
ATOM	1665	CD	ARG	A	217
ATOM	1665	CD	ARG	A	217
ATOM	1665	CD	ARG	A	217
ATOM	1668	NH1	ARG	A	217
ATOM	1668	NH1	ARG	A	217
ATOM	1668	NH1	ARG	A	217
ATOM	1702	CD2	LEU	A	220
ATOM	1703	N	ASN	A	221
ATOM	1706	O	ASN	A	221
ATOM	1758	CB	LEU	A	227
ATOM	1761	CD2	LEU	A	227
ATOM	1784	CD1	PHE	A	230
ATOM	1786	CE1	PHE	A	230
ATOM	1792	O	ASN	A	231
ATOM	1809	CB	VAL	A	233
ATOM	1810	CG1	VAL	A	233
ATOM	1812	N	ALA	A	234
ATOM	1816	CB	ALA	A	234
ATOM	1822	CG	MET	A	235
ATOM	1857	O	TYR	A	239
ATOM	1870	CB	GLU	A	240
ATOM	1873	OE1	GLU	A	240
ATOM	1874	OE2	GLU	A	240
ATOM	1876	CA	PRO	A	241
ATOM	1878	O	PRO	A	241
ATOM	1883	CA	LEU	A	242
ATOM	1888	CD1	LEU	A	242
ATOM	1904	OE1	GLN	A	244
ATOM	1905	NE2	GLN	A	244
ATOM	1913	OD2	ASP	A	245
ATOM	1920	ND1	HIS	A	246
ATOM	1921	CD2	HIS	A	246
ATOM	1922	CE1	HIS	A	246
ATOM	1923	NE2	HIS	A	246
ATOM	1929	CG1	VAL	A	247
ATOM	1930	CG2	VAL	A	247
ATOM	1942	O	ILE	A	249
ATOM	1945	CG2	ILE	A	249
ATOM	1946	CD1	ILE	A	249
ATOM	1961	C	PRO	A	252
ATOM	1962	O	PRO	A	252
ATOM	1963	CB	PRO	A	252
ATOM	1963	CB	PRO	A	252
ATOM	1965	CD	PRO	A	252
ATOM	1971	CG	LEU	A	253
ATOM	1973	CD2	LEU	A	253
ATOM	1973	CD2	LEU	A	253
ATOM	1988	O	GLN	A	256
ATOM	1990	CG	GLN	A	256
ATOM	1992	OE1	GLN	A	256
ATOM	1993	NE2	GLN	A	256
ATOM	1995	CA	THR	A	257
ATOM	1996	C	THR	A	257
ATOM	1997	O	THR	A	257
ATOM	2000	CG2	THR	A	257
ATOM	2011	CG2	ILE	A	259
ATOM	2030	CG	LEU	A	262
ATOM	2031	CD1	LEU	A	262
ATOM	2032	CD2	LEU	A	262
ATOM	2035	C	ASP	A	263
ATOM	2036	O	ASP	A	263
ATOM	2037	CB	ASP	A	263
ATOM	2065	OG	SER	A	267
ATOM	2075	CA	LYS	A	269
ATOM	2078	CB	LYS	A	269
ATOM	2106	CD1	LEU	A	272
ATOM	2234	O	GLU	A	290
ATOM	2234	O	GLU	A	290
ATOM	2235	CB	GLU	A	290
ATOM	2238	OE1	GLU	A	290
ATOM	2238	OE1	GLU	A	290
ATOM	2239	OE2	GLU	A	290
ATOM	2246	CD1	PHE	A	291
ATOM	2248	CE1	PHE	A	291
ATOM	2255	CB	THR	A	292
ATOM	2256	OG1	THR	A	292
ATOM	2257	CG2	THR	A	292
ATOM	2257	CG2	THR	A	292
ATOM	2262	CB	PRO	A	293
ATOM	2263	CG	PRO	A	293
ATOM	2264	CD	PRO	A	293
ATOM	2269	CB	PHE	A	294
ATOM	2272	CD2	PHE	A	294
ATOM	2273	CE1	PHE	A	294
ATOM	2274	CE2	PHE	A	294
ATOM	2275	CZ	PHE	A	294
ATOM	2277	CA	ASP	A	295
ATOM	2279	O	ASP	A	295
ATOM	2280	CB	ASP	A	295
ATOM	2281	CG	ASP	A	295
ATOM	2282	OD1	ASP	A	295
ATOM	2282	OD1	ASP	A	295
ATOM	2283	OD2	ASP	A	295
ATOM	2292	CA	VAL	A	297
ATOM	2297	CG2	VAL	A	297
ATOM	2297	CG2	VAL	A	297
ATOM	2303	CG	ARG	A	298
ATOM	2307	NH1	ARG	A	298
ATOM	2312	O	GLN	A	299
ATOM	2314	CG	GLN	A	299
ATOM	2317	NE2	GLN	A	299
ATOM	2319	CA	CYS	A	300
ATOM	2322	CB	CYS	A	300
ATOM	2323	SG	CYS	A	300
ATOM	2324	N	SER	A	301
ATOM	2329	OG	SER	A	301
ATOM	2329	OG	SER	A	301
ATOM	2339	CG1	VAL	A	303
ATOM	2340	CG2	VAL	A	303
ATOM	2342	CA	THR	A	304
ATOM	2344	O	THR	A	304
ATOM	2346	OG1	THR	A	304
ATOM	2351	O	PHE	A	305
ATOM	2351	O	PHE	A	305
ATOM	2351	O	PHE	A	305
ATOM	2351	O	PHE	A	305
ATOM	2352	CB	PHE	A	305
ATOM	2353	CG	PHE	A	305
ATOM	2354	CD1	PHE	A	305
ATOM	2355	CD2	PHE	A	305
ATOM	2360	CA	GLN	A	306
ATOM	2361	C	GLN	A	306
ATOM	2362	O	GLN	A	306
ATOM	2363	CB	GLN	A	306
